# Supplementary material for: Validation of Inflammatory Prognostic Biomarkers in Pleural Mesothelioma
Source: MDPI journal article supplement (doi:10.3390/cancers16010093), 2023-12-24
Supplement: s1 [file s1]

**Supplementary Table S1.** Partaking Departments.

| <b>Department</b>                                                                                                              | <b>Number of patients</b> | <b>Ethics committee</b>                                                                             |
|--------------------------------------------------------------------------------------------------------------------------------|---------------------------|-----------------------------------------------------------------------------------------------------|
| Gazi University, School of Medicine, Department of Thoracic Surgery, Ankara, Turkey                                            | 41                        | Gazi University Clinical Research Ethics Committee 19/11/2022                                       |
| Karl Landsteiner University of Health Sciences, Department of General and Thoracic Surgery, University Hospital Krems, Austria | 38                        | Commission for Scientific Integrity and Ethics of the Karl Landsteiner Private University 1047/2021 |
| IRCCS Azienda Ospedaliero Universitaria di Bologna, Division of Thoracic Surgery, Italy                                        | 12                        | Comitato Etico Area Vasta Emilia Centro CE AVEC 340/2022/Oss/AOUBo                                  |
| Barts Thorax Centre, St Bartholomew's Hospital, Barts Health NHS Trust, London, UK                                             | 7                         | Clinical Ethics Committee, The Royal Hospital NHS Trust, no. 2520                                   |
